# Supplementary material for: Sociodemographic and environmental characteristics associated with thoughts of death and suicidal ideation in community-dwelling residents of a rural town in Japan: analyses from a perspective of accompanying problems
Source: BMC Public Health. 2024 Apr 23;24:1130. doi: 10.1186/s12889-024-18538-2 (PMC11040995; doi:10.1186/s12889-024-18538-2)
Supplement: Supplementary file 5 — Supplementary Material 5. [file 12889_2024_18538_MOESM5_ESM.xls]

## Sheet: SupplementaryTable4
Supplementary table 4. Sociodemographic and environmental characteristics associated with thought of death and suicidal ideation in past one month: health problems
		Health problem with suicidal ideation				Logistic regression analyses
						Complete Case Analysis				Multiple Imputation
		Absence (n=1732)		Presence(n=112)		Crude	Adjusted** OR	95%CI		Adjusted** OR	95%CI
		n	%	n	%			Lower	Upper		Lower	Upper
Sex
	Men	773	95.2	39	4.8	1	1	-	-	1	-	-
	Women	909	92.66	72	7.34	1.57	1.678	1.032	2.728	1.46593	0.96054	2.2372
Age
	20-39	195	90.7	20	9.3	1	⁻	⁻	⁻	⁻	⁻	⁻
	40-59	441	92.84	34	7.16	0.752	⁻	⁻	⁻	⁻	⁻	⁻
	60-69	446	94.69	25	5.31	0.547	⁻	⁻	⁻	⁻	⁻	⁻
	70-79	402	95.94	17	4.06	0.412	⁻	⁻	⁻	⁻	⁻	⁻
	≥80	229	93.47	16	6.53	0.681	⁻	⁻	⁻	⁻	⁻	⁻
Smoking
	Never	927	94.3	56	5.7	1	⁻	⁻	⁻	⁻	⁻	⁻
	Current	318	92.44	26	7.56	1.353	⁻	⁻	⁻	⁻	⁻	⁻
	Past	384	95.29	19	4.71	0.819	⁻	⁻	⁻	⁻	⁻	⁻
Drinking
	Never	850	93.3	61	6.7	1	⁻	⁻	⁻	⁻	⁻	⁻
	1-5 times / month	241	94.14	15	5.86	0.867	⁻	⁻	⁻	⁻	⁻	⁻
	3-5 times/ week	157	95.15	8	4.85	0.71	⁻	⁻	⁻	⁻	⁻	⁻
	Everyday	420	95.45	20	4.55	0.664	⁻	⁻	⁻	⁻	⁻	⁻
Family structure
	Single	142	92.21	12	7.79	-	⁻	⁻	⁻	⁻	⁻	⁻
	One generation (couple only)	395	95.41	19	4.59	-	⁻	⁻	⁻	⁻	⁻	⁻
	Other (2nd generation)	1158	93.77	77	6.23	-	⁻	⁻	⁻	⁻	⁻	⁻
Suicide in the surroundings
	Absence	501	95.98	21	4.02	1	1	-	-	1	-	-
	Presence	1157	92.71	91	7.29	1.876	1.957	1.064	3.603	1.89325	1.14149	3.1401
K6
	8 ≥	1293	97.58	32	2.42	1	1	-	-	1	-	-
	≥ 9	274	79.19	72	20.81	10.618	8.975	5.484	14.687	7.83921	5.04318	12.1854
Someone for help
	Presence	1613	94.38	96	5.62	1	⁻	⁻	⁻	⁻	⁻	⁻
	Absence	119	88.15	16	11.85	2.26	⁻	⁻	⁻	⁻	⁻	⁻
Someone within the family for help
	Presence	1187	94.81	65	5.19	1	⁻	⁻	⁻	⁻	⁻	⁻
	Absence	545	92.06	47	7.94	1.575	⁻	⁻	⁻	⁻	⁻	⁻
Someone outside of the family who can help
	Presence	982	94.33	59	5.67	1	⁻	⁻	⁻	⁻	⁻	⁻
	Absence	750	93.4	53	6.6	1.176	⁻	⁻	⁻	⁻	⁻	⁻
Resillience skills*		mean	SD	mean	SD
	Optimism	7.09975	1.58007	6.33028	1.55787	0.75	0.851	0.736	0.983	0.86484	0.75971	0.9845
	Human resourcefulness	14.5131	2.72517	13.8381	3.05439	0.918	⁻	⁻	⁻	⁻	⁻	⁻
	Problem solving oriented	9.86116	2.13927	9.20952	2.32336	0.872	⁻	⁻	⁻	⁻	⁻	⁻
*Based on 5-unit increase
**Stepwise selection method
