# Supplementary material for: Sociodemographic and environmental characteristics associated with thoughts of death and suicidal ideation in community-dwelling residents of a rural town in Japan: analyses from a perspective of accompanying problems
Source: BMC Public Health. 2024 Apr 23;24:1130. doi: 10.1186/s12889-024-18538-2 (PMC11040995; doi:10.1186/s12889-024-18538-2)
Supplement: Supplementary file 6 — Supplementary Material 6. [file 12889_2024_18538_MOESM6_ESM.xls]

## Sheet: SupplementalyTable5
Supplementary table 5. Sociodemographic and environmental characteristics associated with thought of death and suicidal ideation in past one month: financial problems
		Financial problem with suicidal ideation				Logistic regression analyses
						Complete Case Analysis				Multiple Imputation
		Absence (n=1772)		Presence(n=72)		Crude	Adjusted** OR	95%CI		Adjusted** OR	95%CI
		n	%	n	%			Lower	Upper		Lower	Upper
Sex
	Men	780	96.06	32	3.94	1	-	-	-	-	-	-
	Women	942	96.02	39	3.98	1.009	-	-	-	-	-	-
Age
	20-39	207	96.28	8	3.72	1	-	-	-	-	-	-
	40-59	444	93.47	31	6.53	1.807	-	-	-	-	-	-
	60-69	451	95.75	20	4.25	1.147	-	-	-	-	-	-
	70-79	411	98.09	8	1.91	0.504	-	-	-	-	-	-
	≥80	241	98.37	4	1.63	0.43	-	-	-	-	-	-
Smoking
	Current	322	93.6	22	6.4	2.33	-	-	-	-	-	-
	Past	386	95.78	17	4.22	1.502	-	-	-	-	-	-
	Never	955	97.15	28	2.85	1	-	-	-	-	-	-
Drinking
	Never	874	95.94	37	4.06	1	-	-	-	-	-	-
	1-5 times / month	248	96.88	8	3.13	0.762	-	-	-	-	-	-
	3-5 times/ week	159	96.36	6	3.64	0.891	-	-	-	-	-	-
	Everyday	420	95.45	20	4.55	1.125	-	-	-	-	-	-
Family structure
	Single	145	94.16	9	5.84	1.68	-	-	-	-	-	-
	One generation (couple only)	396	95.65	18	4.35	1.23	-	-	-	-	-	-
	Other (2nd generation)	1191	96.44	44	3.56	1	-	-	-	-	-	-
Suicide in the surroundings
	Absence	516	98.85	6	1.15	1	1	-	-	1	-	-
	Presence	1184	94.87	64	5.13	4.649	3.762	1.457	9.711	4.24161	1.81067	9.93623
K6
	8 ≥	1301	98.19	24	1.81	1	1	-	-	1	-	-
	≥ 9	302	87.28	44	12.72	7.899	6.111	3.362	11.11	5.49133	3.23554	9.31985
Someone for help
	Presence	1657	96.96	52	3.04	1	1	-	-	1	-	-
	Absence	115	85.19	20	14.81	5.542	3.728	1.918	7.246	3.81663	2.1071	6.91313
Someone within the family for help
	Presence	1221	97.52	31	2.48	1	-	-	-	-	-	-
	Absence	551	93.07	41	6.93	2.931	-	-	-	-	-	-
Someone outside of the family who can help
	Presence	1006	96.64	35	3.36	1	-	-	-	-	-	-
	Absence	766	95.39	37	4.61	1.388	-	-	-	-	-	-
Resillience skills*		mean	SD	mean	SD
	Optimism	7.08762	1.5677	6.19718	1.84096	0.717	0.836	0.706	0.989	0.85814	0.73802	0.99
	Human resourcefulness	14.5073	2.72175	13.597	3.28015	0.892	-	-	-	-	-	-
	Problem solving oriented	9.83649	2.13783	9.43077	2.56155	0.918	-	-	-	-	-	-
*Based on 5-unit increase
**Stepwise selection method
